# Supplementary material for: Life Cycle Assessment of the Cellulosic Jet Fuel Derived from Agriculture Residue
Source: MDPI journal article supplement (doi:10.3390/aerospace10020129), 2023-01-31
Supplement: s1 [file s1]

Table S1 Emission of different aircraft with different engine using conventional aviation fuel

|                      | Single aisle | Small twin<br>aisle | Large twin<br>aisle | Large quad | Regional<br>jet | Business jet   |
|----------------------|--------------|---------------------|---------------------|------------|-----------------|----------------|
| Aircraft             | 737-800      | 787-8               | 777-200             | A380       | ERJ-145         | G550           |
| Engines              | CFM56-7B27   | Genx-1B67           | GE90-85B            | TRENT970   | AE3007<br>A3    | BR700-710C4-11 |
| Engine NO.           | 2            | 2                   | 2                   | 4          | 2               | 2              |
| Bypass ratio         | 5.1          | 9.39                | 8.36                | 7.5        | 5.1             | 4.05           |
| Full thrust /kN      | 121.4        | 255.3               | 419.25              | 334.7      | 31.5            | 68.77          |
| Flight range         | 5665         | 15190               | 14260               | 15700      | 2873            | 12500          |
| LTO FC, kg*          | 912          | 1644                | 2268                | 1960       | 300             | 588            |
| Cruise SFC           | 3.53         | 6.57                | 9.31                | 16.28      | 1.68            | 1.15           |
| Envelope flight, kg  | 20871        | 101217              | 137270              | 259484     | 5094            | 15025          |
| HC /g*               | 670          | 488                 | 476                 | 162        | 802             | 602            |
| CO /g*               | 6872         | 14142               | 13052               | 12922      | 4976            | 8898           |
| NO <sub>x</sub> /g * | 13438        | 19518               | 48956               | 33110      | 2858            | 5700           |
| CH <sub>4</sub> /g*  | 36           | 59                  | 185                 | 159        | 11              | 24             |
| N <sub>2</sub> O /g  | 70           | 115                 | 363                 | 311        | 22              | 47             |
| CO <sub>2</sub> /kg  | 2797         | 4579                | 14436               | 12362      | 866             | 1846           |
| PM10 /g              | 21           | 28                  | 39                  | 79         | 7               | 20             |
| SO <sub>x</sub> /g   | 1,243        | 2,036               | 6,406               | 5,488      | 386             | 823            |

\* ICAO Emission Database (<https://www.easa.europa.eu/en/domains/environment/icao-aircraft-engine-emissions-databank>)
